# Supplementary material for: Facile preparation of rosin-based biochar coated bentonite for supporting α-Fe2O3nanoparticles and its application for Cr(vi) adsorption
Source: Royal Society of Chemistry journal article supplement (doi:10.1039/c4ta06491g), 2015-01-01
Supplement: c4ta06491g1.pdf [file c4ta06491g1.pdf]

## Electronic Supplementary Information

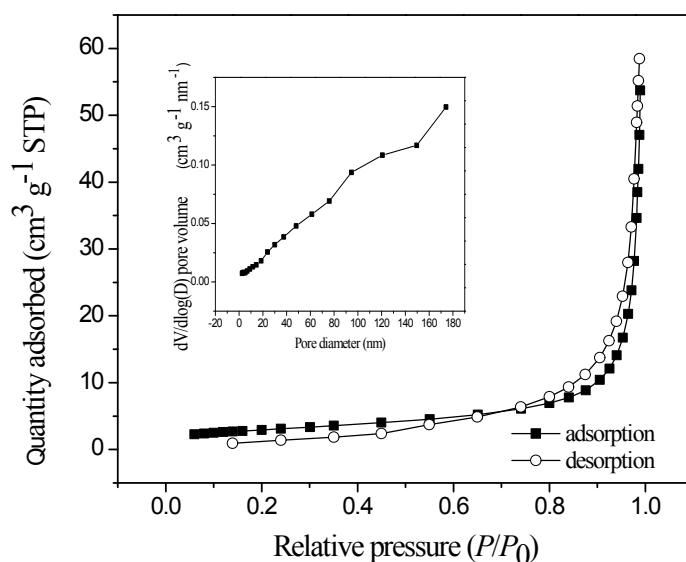

**Fig. 1S** Nitrogen adsorption-desorption isotherm and pore size distribution (inset) of Bt/Bc/α-Fe<sub>2</sub>O<sub>3</sub>

Figure 2S shows the FTIR spectra of Bt, rosin and Bt/Bc/α-Fe<sub>2</sub>O<sub>3</sub> between 4000 and 400 cm<sup>-1</sup>. The spectrum of Bt consisted of the bands at 3650, 3420, 1037, 790, 520 and 467 cm<sup>-1</sup>. The band at 3650 cm<sup>-1</sup> was O-H stretching vibrations of Si-OH groups. The broad band centered near 3420 cm<sup>-1</sup> represented -OH vibration band of silicate skeleton. The peak at 1037 cm<sup>-1</sup> corresponded to Si-O-Si groups of the tetrahedral sheets, and bands at 790, 520, and 467 cm<sup>-1</sup> were due to the deformation and bending modes of the Si-O bond.<sup>1</sup> Some typical peaks of rosin at 3430, 2936 and 1697 cm<sup>-1</sup> were assigned to O-H stretch in COOH, C-H stretch in pyranoid ring and C=O stretch in COOH, respectively.<sup>2</sup> After the pyrolysis reaction, the identical peaks of rosin at near 3430, 2936 and 1697 cm<sup>-1</sup> got weak or even disappeared in Bt/Bc/α-Fe<sub>2</sub>O<sub>3</sub> because of biochar generation from the pyrolysis of rosin at high temperature. The peaks of Bt had a similar result as rosin occurring in Bt/Bc/α-Fe<sub>2</sub>O<sub>3</sub> due to the Bt being covered by biochar or α-Fe<sub>2</sub>O<sub>3</sub>. Moreover, the bands of Bt/Bc/α-Fe<sub>2</sub>O<sub>3</sub> at 556

and  $470\text{ cm}^{-1}$  could be attributed to the Fe-O stretching vibration in  $\alpha\text{-Fe}_2\text{O}_3$ .<sup>3,4</sup> Furthermore, the bands at  $3393$  and  $1630\text{ cm}^{-1}$  in Bt/Bc/ $\alpha\text{-Fe}_2\text{O}_3$  could correspond the stretching vibration and bending vibration of surface OH groups in  $\alpha\text{-Fe}_2\text{O}_3$ .<sup>4</sup> The FTIR results indicate the pyrolysis of rosin into biochar, Bt being coated as substrate, and the production of  $\text{Fe}_2\text{O}_3$  during the preparation of Bt/Bc/ $\alpha\text{-Fe}_2\text{O}_3$ .

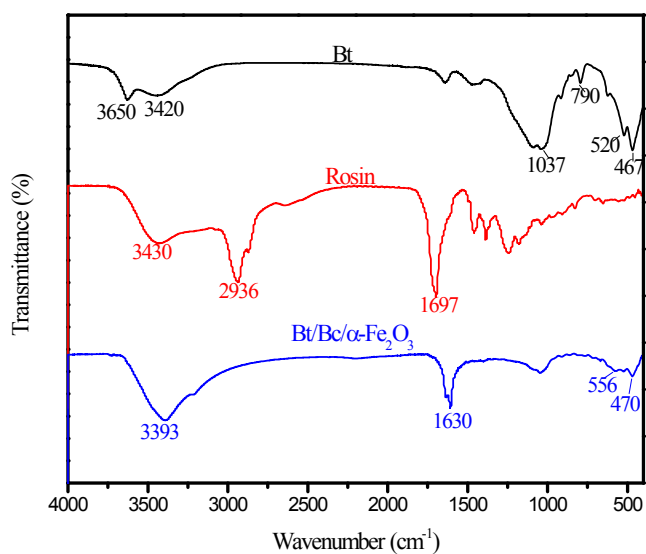

**Fig. 2S** FTIR spectra of Bt, rosin, and Bt/Bc/ $\alpha\text{-Fe}_2\text{O}_3$ .

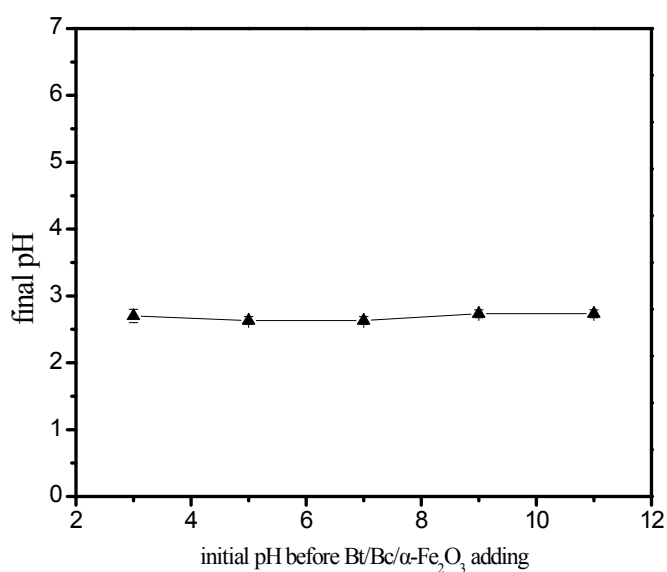

**Fig. 3S** Variation of Bt/Bc/ $\alpha$ -Fe<sub>2</sub>O<sub>3</sub> suspension pH after immersing into aqueous solution with different pH. (adsorbent dosage: 0.8 g L<sup>-1</sup>, shaking speed: 100 rpm, contact time: 30 min, T: 25 °C)

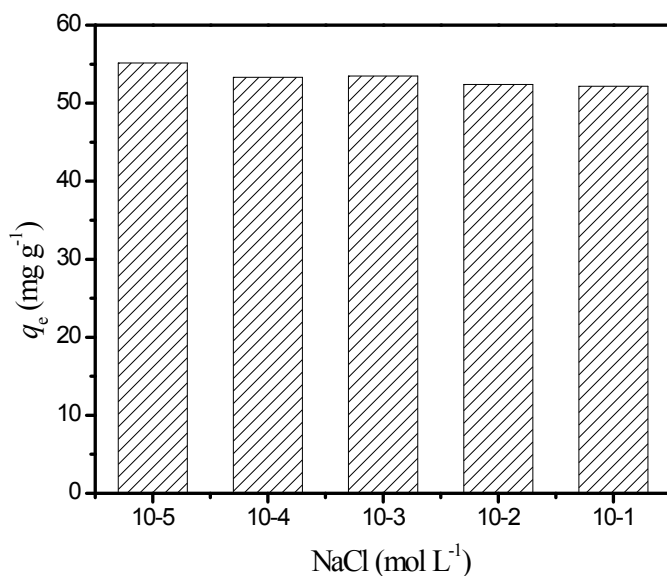

**Fig. 4S** Effect of Na<sup>+</sup> and Cl<sup>-</sup> on the removal of Cr (VI) by Bt/Bc/ $\alpha$ -Fe<sub>2</sub>O<sub>3</sub>. (adsorbent dosage: 0.8 g L<sup>-1</sup>, Cr(VI) concentration: 50 mg L<sup>-1</sup>, shaking speed: 100 rpm, contact time: 30 min, T: 25 °C)

## References

- 1 T. S. Anirudhan, P. S. Suchithra and S. Rijith, *Colloids and Surf., A: Physicochem. Eng. Aspects*, 2008, **326**, 147-156.
- 2 M. M. Abeer, M. C. Amin, A. M. Lazim, M. Pandey and C. Martin, *Carbohydr. Polym.*, 2014, **110**, 505-512.
- 3 G. K. Pradhan and K. M. Parida, *ACS Appl. Mater. Interfaces*, 2011, **3**, 317-323.
- 4 F. Wang, X. F. Qin, Y. F. Meng, Z. L. Guo, L. X. Yang and Y. F. Ming, *Mater. Sci. Semicond. Process.*, 2013, **16**, 802-806.
